# Supplementary material for: Partial thioamide scan on the lipopeptaibiotic trichogin GA IV. Effects on folding and bioactivity
Source: PubMed Central journal article supplement (PMC3458734; doi:10.3762/bjoc.8.129), 2012-07-24
Supplement: Beilstein_J_Org_Chem-08-1161-s001.pdf [file Beilstein_J_Org_Chem-08-1161-s001.pdf]

**Supporting Information**  
**for**  
**Partial thioamide scan on the lipopeptaibiotic trichogin GA IV. Effects on**  
**folding and bioactivity**

Marta De Zotti<sup>1</sup>, Barbara Biondi<sup>1</sup>, Cristina Peggion<sup>1</sup>, Matteo De Poli<sup>1</sup>, Haleh Fathi<sup>1</sup>, Simona Oancea<sup>2</sup>, Claudio Toniolo<sup>1</sup> and Fernando Formaggio\*<sup>1</sup>

Address: <sup>1</sup>ICB, Padova Unit, CNR, Department of Chemistry, University of Padova, 35131 Padova, Italy and <sup>2</sup>Department of Biochemistry and Toxicology, Lucian Blaga University of Sibiu, 550012 Sibiu, Romania

Email: Fernando Formaggio\* - fernando.formaggio@unipd.it

\*Corresponding author

**Chemical characterization data for the peptides reported in Schemes 1–3.**

**Table S-I:** ROE constraints, deviations from idealized geometry, and mean energies for the NMR-based structures (energy < 144 kcal/mol) of  $\psi$ [CS-NH]<sup>9</sup>.

| Number of NOEs                                                |        |
|---------------------------------------------------------------|--------|
| total                                                         | 69     |
| intraresidue                                                  | 24     |
| sequential                                                    | 23     |
| $i, i+n, n = 2, 3, 4$                                         | 22     |
| Mean rmsd <sup>(a)</sup> from ideality of accepted structures |        |
| bonds (Å)                                                     | 0.0086 |
| angles (°)                                                    | 1.05   |
| impropers (°)                                                 | 67.0   |
| ROEs (Å)                                                      | 0.118  |
| Mean energies (kcal/mol) of accepted structures               |        |
| E <sub>overall</sub>                                          | 140.8  |
| E <sub>bond</sub>                                             | 12.6   |
| E <sub>angle</sub>                                            | 46.7   |
| E <sub>ROE</sub>                                              | 44.3   |

(a) Root-mean-square deviation.

**Table S-II:** Average values (°) for the torsion angles  $\phi_m$  and  $\psi_m$  and their relative standard deviations resulting from the 18 calculated structures (energy < 144 kcal/mol) of  $\psi$ [CS-NH]<sup>9</sup> (400 MHz, 1 mM in CD<sub>3</sub>CN solution, 298 K).

| Residue                 | $\phi_m$ | $\Delta\phi$ | $\psi_m$ | $\Delta\psi$ |
|-------------------------|----------|--------------|----------|--------------|
| Aib <sup>1</sup>        | —        | —            | 67.1     | ±1.0         |
| Gly <sup>2</sup>        | 146.8    | ±5.3         | -33.5    | ±2.6         |
| L-Leu <sup>3</sup>      | -46.2    | ±2.6         | -45.1    | ±3.2         |
| Aib <sup>4</sup>        | -79.5    | ±1.0         | -24.6    | ±3.2         |
| Gly <sup>5</sup>        | -130.2   | ±4.9         | -22.2    | ±5.0         |
| Gly <sup>6</sup>        | -71.8    | ±2.6         | -25.3    | ±1.7         |
| L-Leu <sup>7</sup>      | -74.5    | ±1.5         | -28.1    | ±3.5         |
| Aib <sup>8</sup>        | -62.2    | ±3.8         | -28.3    | ±1.7         |
| Gly <sup>9</sup> (CS)   | -89.2    | ±4.9         | -52.2    | ±1.1         |
| L-Ile <sup>10</sup>     | -106.1   | ±2.8         | -16.0    | ±3.1         |
| L-Leu-OMe <sup>11</sup> | -49.1    | ±8.1         | —        | —            |

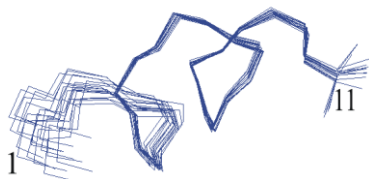

**Figure S-I:** Representation of the 18 3D structures with energy < 144 kcal/mol resulting from the MD calculations of  $\psi$ [CS-NH]<sup>9</sup> with the backbone atoms of residues 4–11 superimposed.

**Chemical characterization data for the peptides reported in Schemes 1–3 and not characterized elsewhere [1-5]**

**Boc-Aib-Gly-Ile-Leu-OMe:** mp 170–172 °C;  $R_{f1}$  0.40;  $R_{f2}$  0.85;  $R_{f3}$  0.30;  $[\alpha]_D^{20}$ : -91.1 (*c* 0.1, MeOH);  $^1\text{H NMR}$  (200 MHz,  $\text{CDCl}_3$ )  $\delta$  7.86 (d, 1H, Ile NH), 7.00 (t, 1H, Gly NH), 6.77 (d, 1H, Leu NH), 5.02 (s, 1H, Aib NH), 4.64–4.52 (m, 1H, Leu  $\alpha$ -CH), 4.34–4.27 (m, 1H, Ile  $\alpha$ -CH), 3.95–3.27 (d, 2H, Gly  $\alpha$ -CH<sub>2</sub>), 3.70 (s, 3H, OMe CH<sub>3</sub>), 2.07 (m, 1H, Ile  $\beta$ -CH), 1.78–1.63 (m, 20H, Leu  $\gamma$ -CH, Boc 3 CH<sub>3</sub>, Aib 2  $\beta$ -CH<sub>3</sub>, Leu  $\beta$ -CH<sub>2</sub>, Ile  $\gamma$ -CH<sub>2</sub>), 0.95–0.85 (m, 12H, Leu 2  $\delta$ -CH<sub>3</sub>, Ile  $\gamma$ - and  $\delta$ -CH<sub>3</sub>); IR (KBr) 3288, 1756, 1652, 1526  $\text{cm}^{-1}$ .

**Boc-Gly-Leu-Aib-Gly-Ile-Leu-OMe:** mp 82–84 °C;  $R_{f1}$  0.40;  $R_{f2}$  0.95;  $R_{f3}$  0.30;  $^1\text{H NMR}$  (200 MHz,  $\text{CDCl}_3$ )  $\delta$  7.86–7.22 (d, 1H, Leu NH), 7.34–7.30 (m, 2H, Ile NH, Gly NH), 6.99 (s, 1H, Aib NH), 6.73–6.69 (d, 1H, Leu NH), 5.68–5.62 (t, 1H, Gly NH), 4.18–3.35 (m, 10H, 2 Leu  $\alpha$ -CH, Ile  $\alpha$ -CH, 2 Gly  $\alpha$ -CH<sub>2</sub>, OMe CH<sub>3</sub>), 2.08 (m, 1H, Ile  $\beta$ -CH), 1.64–1.50 (m, 14H, 2 Leu  $\beta$ -CH<sub>2</sub>, 2 Leu  $\gamma$ -CH, Aib 2  $\beta$ -CH<sub>3</sub>), 1.41 (s, 9H, Boc 3 CH<sub>3</sub>, Ile  $\gamma$ -CH<sub>2</sub>), 0.95–0.82 (m, 18H, 2 Leu 2  $\delta$ -CH<sub>3</sub>, Ile  $\gamma$ - and  $\delta$ -CH<sub>3</sub>); IR (KBr): 3315, 1654, 1536  $\text{cm}^{-1}$ .

**Boc-Gly- $\psi$ [CS-NH]-Leu-Aib-OMe:** mp 79–82 °C;  $R_{f1}$  0.90;  $R_{f2}$  0.90;  $R_{f3}$  0.45;  $[\alpha]_D^{20}$  -58.8 (*c* 0.5, MeOH);  $^1\text{H NMR}$  (200 MHz,  $\text{CDCl}_3$ )  $\delta$  8.97 (d, 1H, Leu NH), 7.08 (s, 1H, Aib NH), 5.51 (m, 1H, Gly NH), 4.43 (m, 2H, Gly  $\alpha$ -CH<sub>2</sub>), 4.12 (m, 1H, Leu  $\alpha$ -CH), 3.71 (s, 3H, OMe CH<sub>3</sub>), 1.66 (m, 3H; Leu  $\beta$ -CH<sub>2</sub> and  $\gamma$ -CH), 1.51 (m, 6H, Aib 2  $\beta$ -CH<sub>3</sub>), 1.41 (s, 9H Boc 3 CH<sub>3</sub>), 0.93 (d, 6H, Leu 2  $\delta$ -CH<sub>3</sub>); IR (KBr): 3446, 3280, 1738, 1720, 1694, 1652, 1547, 1526  $\text{cm}^{-1}$ .

**Boc-Aib-Gly- $\psi$ [CS-NH]-Leu-Aib-OMe:** mp 175–178 °C;  $R_{f1}$  0.85;  $R_{f2}$  0.90;  $R_{f3}$  0.20;  $[\alpha]_D^{20}$  -40.9 (*c* 0.5, MeOH);  $^1\text{H NMR}$  (200 MHz,  $\text{CDCl}_3$ )  $\delta$  8.97 (d, 1H, Leu NH) 7.08 (s, 1H, Aib NH), 6.10 (s, 1H, Aib NH), 5.51 (m, 1H, Gly NH), 4.43 (m, 2H, Gly  $\alpha$ -CH<sub>2</sub>), 4.12 (m, 1H, Leu  $\alpha$ -CH), 3.71 (s, 3H, OMe CH<sub>3</sub>), 1.66 (m, 3H; 2H Leu  $\beta$ -CH<sub>2</sub> and  $\gamma$ -CH), 1.51 (m, 12H, 2 Aib 2  $\beta$ -CH<sub>3</sub>), 1.41 (s, 9H Boc 3 CH<sub>3</sub>), 0.93 (d, 6H, Leu 2  $\delta$ -CH<sub>3</sub>); IR (KBr): 3349, 3265, 1717, 1691, 1665, 1510  $\text{cm}^{-1}$ .

***n*-Oct-Aib-Gly- $\psi$ [CS-NH]-Leu-Aib-OMe:** oil;  $R_{f1}$  0.81;  $R_{f2}$  0.90;  $R_{f3}$  0.15;  $[\alpha]_D^{20}$  -5.68 (*c* 0.2, MeOH);  $^1\text{H NMR}$  (200 MHz,  $\text{CDCl}_3$ )  $\delta$  8.97 (d, 1H, Leu NH) 7.08 (s, 1H, Aib NH), 6.10 (s, 1H, Aib NH), 5.51 (m, 1H, Gly NH), 4.43 (m, 2H, Gly  $\alpha$ -CH<sub>2</sub>), 4.12 (m, 1H, Leu  $\alpha$ -CH), 3.71 (s, 3H, OMe CH<sub>3</sub>), 2.28 (m, 2H, *n*-Oct  $\beta$ -CH<sub>2</sub>), 1.66 (m, 3H, Leu  $\beta$ -CH<sub>2</sub> and  $\gamma$ -CH), 1.51 (m, 12H, 2 Aib 2  $\beta$ -CH<sub>3</sub>), 1.26 (m, 10H, *n*-Oct 5 CH<sub>2</sub>), 0.93–0.82 (m, 9H, Leu 2  $\delta$ -CH<sub>3</sub> and *n*-Oct  $\omega$ -CH<sub>3</sub>); IR (KBr): 3313, 3240, 1742, 1730, 1650, 1531  $\text{cm}^{-1}$ .

***n*-Oct-Aib-Gly- $\psi$ [CS-NH]-Leu-Aib-OH:**  $R_{f1}$  0.10;  $R_{f2}$  0.70;  $R_{f3}$  0.00;  $^1\text{H NMR}$  (200 MHz,  $\text{CDCl}_3$ )  $\delta$  8.97 (d, 1H, Leu NH) 7.08 (s, 1H, Aib NH), 6.10 (s, 1H, Aib NH), 5.51 (m, 1H, Gly NH), 4.43 (m, 2H, Gly  $\alpha$ -CH<sub>2</sub>), 4.12 (m, 1H, Leu  $\alpha$ -CH), 2.28 (m, 2H, *n*-Oct  $\beta$ -CH<sub>2</sub>), 1.66 (m, 3H, Leu  $\beta$ -CH<sub>2</sub> and  $\gamma$ -CH), 1.51 (m, 12H, 2 Aib 2  $\beta$ -CH<sub>3</sub>), 1.26 (m, 10H, *n*-Oct 5 CH<sub>2</sub>), 0.93–0.82 (m, 9H, Leu 2  $\delta$ -CH<sub>3</sub> and *n*-Oct  $\omega$ -CH<sub>3</sub>); IR (KBr): 3310, 3044, 1720, 1650, 1531  $\text{cm}^{-1}$ .

***n*-Oct-Aib-Gly- $\psi$ [CS-NH]-Leu-Aib-Gly-Gly-Leu-Aib-Gly-Ile-Leu-OMe:** mp 114–116 °C;  $R_{f1}$  0.20;  $R_{f2}$  0.85;  $R_{f3}$  0.00;  $[\alpha]_D^{20}$  -38.61 (*c* 0.5, MeOH);  $^1\text{H NMR}$  (400 MHz,  $\text{CD}_3\text{CN}$ )  $\delta$  9.30 (d, 1H, NH Leu<sup>3</sup>), 7.77 (t, 1H, NH Gly<sup>6</sup>), 7.49 (t, 1H, NH Gly<sup>2</sup>), 7.47 (t, 1H, NH Gly<sup>5</sup>), 7.47 (s, 1H, NH Aib<sup>4</sup>), 7.42 (t, 1H, NH Gly<sup>9</sup>), 7.40 (d, 1H, NH Leu<sup>7</sup>), 7.37 (s, 1H, NH Aib<sup>8</sup>), 7.30 (d, 1H, NH Ile<sup>10</sup>), 7.22 (s, 1H, NH Aib<sup>1</sup>), 7.12 (d, 1H, NH Leu<sup>11</sup>), 4.21 (m, 1H,  $\alpha$ -CH Leu<sup>11</sup>), 4.20 (m, 1H,  $\alpha$ -CH Leu<sup>7</sup>), 4.17 (m, 1H,  $\alpha$ -CH Leu<sup>3</sup>), 4.05 (dd, 1H,  $\alpha$ -CH Ile<sup>10</sup>), 3.78 (dd, 1H, 1  $\alpha$ -CH Gly<sup>6</sup>), 3.74 (dd, 1H, 1  $\alpha$ -CH Gly<sup>6</sup>), 3.71 (s, 3H, CH<sub>3</sub> OMe), 3.67 (dd, 1H, 1  $\alpha$ -CH Gly<sup>9</sup>), 3.65 (dd, 1H, 1  $\alpha$ -CH Gly<sup>2</sup>), 3.64 (m, 2H,  $\alpha$ -CH<sub>2</sub> Gly<sup>5</sup>), 3.60 (dd, 1H, 1  $\alpha$ -CH Gly<sup>9</sup>), 3.58 (dd, 1H, 1  $\alpha$ -CH Gly<sup>2</sup>), 2.15 (t, 2H,  $\beta$ -CH<sub>2</sub> *n*-Oct), 1.50 (m, 2H,  $\gamma$ -CH<sub>2</sub> *n*-Oct), 2.15 (m, 2H,  $\delta$ -CH<sub>2</sub> *n*-Oct), 1.84 (m, 1H,  $\beta$ -CH Ile<sup>10</sup>), 1.53 (m, 2H,  $\beta$ -CH<sub>2</sub> Leu<sup>7</sup>), 1.53 (m, 2H,  $\beta$ -CH<sub>2</sub> Leu<sup>3</sup>), 1.62 (m, 1H,  $\gamma$ -CH Leu<sup>3</sup>), 1.60 (m, 1H,  $\gamma$ -CH Leu<sup>7</sup>), 1.59 (m, 1H,  $\gamma$ -CH Leu<sup>11</sup>), 1.48 (m, 1H, 1  $\beta$ -CH Leu<sup>11</sup>), 1.53 (m, 1H, 1  $\beta$ -CH Leu<sup>11</sup>), 1.45 (m, 1H,  $\gamma$ -CH Ile<sup>10</sup>), 1.36 (s, 6H, 2  $\beta$ -CH<sub>3</sub> Aib<sup>4</sup>), 1.35 (s, 6H, 2  $\beta$ -CH<sub>3</sub> Aib<sup>8</sup>), 1.32 (s, 6H, 2  $\beta$ -CH<sub>3</sub> Aib<sup>1</sup>), 1.17 (m, 1H, 1  $\gamma$ -CH Ile<sup>10</sup>), 0.88 (m, 3H,  $\delta$ -CH<sub>3</sub> Leu<sup>3</sup>), 0.87 (m, 3H,  $\delta$ -CH<sub>3</sub> Leu<sup>11</sup>), 0.86 (d, 3H,  $\gamma$ -CH<sub>3</sub> Ile<sup>10</sup>), 0.83 (m, 3H,  $\delta$ -CH<sub>3</sub> Leu<sup>3</sup>), 0.81 (m, 3H,  $\delta$ -CH<sub>3</sub> Ile<sup>10</sup>), 0.80 (t, 3H,  $\omega$ -CH<sub>3</sub> *n*-Oct), 0.78 (m, 3H,  $\delta$ -CH<sub>3</sub> Leu<sup>11</sup>); IR (KBr): 3314, 3057, 1744, 1656, 1537  $\text{cm}^{-1}$ .

**Z-Gly-Leu-Aib-Ot-Bu:** mp 112–114 °C;  $R_{f1}$  0.80;  $R_{f2}$  0.65;  $R_{f3}$  0.50;  $[\alpha]_D^{20}$  -39.0 (*c* 0.5, MeOH);  $^1\text{H NMR}$  (200 MHz,  $\text{CDCl}_3$ )  $\delta$  7.33 (m, 5H, Z Ph), 6.85 (s, 1H, Aib NH), 6.79 (d,

1H, Leu NH), 5.70 (t, 1H, Gly NH), 5.10 (s, 2H, Z CH<sub>2</sub>), 4.40 (m, 1H, Leu  $\alpha$ -CH), 3.86 (t, 2H, Gly  $\alpha$ -CH<sub>2</sub>), 1.58 (m, 3H; Leu  $\beta$ -CH<sub>2</sub> and  $\gamma$ -CH), 1.51 (2s, 6H, Aib 2  $\beta$ -CH<sub>3</sub>), 1.43 (s, 9H, *Ot*-Bu 3 CH<sub>3</sub>), 0.91 (d, 6H, Leu 2  $\delta$ -CH<sub>3</sub>); IR (KBr): 3324, 1731, 1705, 1659, 1546 cm<sup>-1</sup>.

**Z-Aib-Gly-Leu-Aib-*Ot*-Bu:** mp 165–166 °C; *R*<sub>f1</sub> 0.50; *R*<sub>f2</sub> 0.80; *R*<sub>f3</sub> 0.30; [ $\alpha$ ]<sub>D</sub><sup>20</sup> -3.2 (*c* 0.5, MeOH); <sup>1</sup>H NMR (200 MHz, CDCl<sub>3</sub>)  $\delta$  7.36 (m, 6H, Z Ph and 1 NH), 6.93 (m, 1H, NH), 6.87 (s, 1H, Aib NH), 5.37 (s, 1H, Aib NH), 5.10 (2d, 2H, Z CH<sub>2</sub>), 4.42 (m, 1H, Leu  $\alpha$ -CH), 3.93 (d, 2H, Gly  $\alpha$ -CH<sub>2</sub>), 1.70–1.68 (m, 3H, Leu  $\beta$ -CH<sub>2</sub> and  $\gamma$ -CH), 1.50–1.48 (m, 12H, 2 Aib 2  $\beta$ -CH<sub>3</sub>), 1.42 (s, 9H, *Ot*-Bu 3 CH<sub>3</sub>), 0.91 (m, 6H, 2 Leu  $\delta$ -CH<sub>3</sub>); IR (KBr): 3316, 1732, 1701, 1659, 1536 cm<sup>-1</sup>.

***n*-Oct-Aib-Gly-Leu-Aib-*Ot*-Bu:** mp 169–171 °C; *R*<sub>f1</sub> 0.45; *R*<sub>f2</sub> 0.55; *R*<sub>f3</sub> 0.30; [ $\alpha$ ]<sub>D</sub><sup>20</sup> -2.58 (*c* 0.5, MeOH); <sup>1</sup>H NMR (200 MHz, CDCl<sub>3</sub>)  $\delta$  6.93 (m, 1H, NH), 6.87 (s, 1H, Aib NH), 5.37 (s, 1H, Aib NH), 4.42 (m, 1H, Leu  $\alpha$ -CH), 3.93 (d, 2H, Gly  $\alpha$ -CH<sub>2</sub>), 2.23 (m, 2H *n*-Oct  $\beta$ -CH<sub>2</sub>) 1.70–1.68 (m, 3H, Leu  $\beta$ -CH<sub>2</sub> and  $\gamma$ -CH), 1.50–1.48 (m, 12H, 2 Aib 2  $\beta$ -CH<sub>3</sub>), 1.42 (s, 9H, *Ot*-Bu 3 CH<sub>3</sub>), 1.26 (m, 10H, *n*-Oct 5 CH<sub>2</sub>), 0.95–0.82 (m, 6H, 2 Leu  $\delta$ -CH<sub>3</sub>, *n*-Oct  $\omega$ -CH<sub>3</sub>); IR (KBr): 3315, 1740, 1709, 1656, 1536 cm<sup>-1</sup>.

**Fmoc-Gly- $\psi$ [CS-NH]-Gly-Leu-Aib-*Ot*-Bu:** mp 108–111 °C; *R*<sub>f1</sub> 0.72; *R*<sub>f2</sub> 0.94; *R*<sub>f3</sub> 0.22; [ $\alpha$ ]<sub>D</sub><sup>20</sup> -18.6 (*c* 0.5, MeOH); <sup>1</sup>H NMR (200 MHz, CDCl<sub>3</sub>)  $\delta$  8.98 (t, 1H, Gly NH), 7.75 (d, 2H, Fmoc), 7.58 (t, 2H, Fmoc), 7.49 (m, 2H, Fmoc), 6.81 (s, 1H, Aib NH), 6.67 (t, 1H, Leu NH), 5.99 (t, 1H, Gly NH), 5.02 (m, H, Leu  $\alpha$ -CH), 4.61–4.73(m,3H, Fmoc), 3.95–3.27 (d, 4H, 2Gly  $\alpha$ -CH<sub>2</sub>), 1.63–1.78(m, 9H, Leu  $\beta$ -CH<sub>2</sub> and  $\gamma$ -CH, Aib 2  $\beta$ -CH<sub>3</sub>), 1.43 (s, 9H, *Ot*-Bu 3 CH<sub>3</sub>), 0.92 (m, 6H, Leu 2  $\delta$ -CH<sub>3</sub>); IR (KBr): 3299, 1730, 1706, 1658, 1528 cm<sup>-1</sup>.

**Fmoc-Gly- $\psi$ [CS-NH]-Gly-Leu-Aib-Gly-Ile-Leu-OMe:** mp 126–128 °C; *R*<sub>f1</sub> 0.74; *R*<sub>f2</sub> 0.92; *R*<sub>f3</sub> 0.15; [ $\alpha$ ]<sub>D</sub><sup>20</sup> -17.3 (*c* 0.5, MeOH); <sup>1</sup>H NMR (200 MHz, CDCl<sub>3</sub>)  $\delta$  8.98 (t, 1H, Gly NH), 7.86 (d, 1H, Ile NH), 7.75 (d, 2H, Fmoc), 7.58 (t, 2H, Fmoc), 7.49 (m, 2H, Fmoc), 7.00 (t, 1H, Gly NH), 6.81 (s, 1H, Aib NH), 6.67 (m, 2H, 2 Leu NH), 5.99 (t, 1H, Gly NH), 5.02 (m, 2H, 2 Leu  $\alpha$ -CH), 4.62–4.87 (m, 3H, Fmoc), 4.34–4.27 (m, 1H, Ile  $\alpha$ -CH), 3.95–3.27 (d, 6H, 3Gly  $\alpha$ -CH<sub>2</sub>), 2.07 (m, 1H, Ile  $\beta$ -CH), 1.78–1.63 (m, 14H, 2 Leu  $\beta$ -CH<sub>2</sub> and  $\gamma$ -CH, Aib 2  $\beta$ -CH<sub>3</sub>, Ile  $\gamma$ -CH<sub>2</sub>), 1.43 (s, 9H, *Ot*-Bu 3 CH<sub>3</sub>), 0.95–0.85 (m, 24H, 2 Leu 2  $\delta$ -CH<sub>3</sub>, Ile  $\gamma$ -CH<sub>3</sub> and  $\delta$ -CH<sub>3</sub>); IR (KBr): 3309, 3065, 1730, 1656, 1531cm<sup>-1</sup>.

***n*-Oct-Aib-Gly-Leu-Aib-Gly-ψ[CS-NH]-Gly-Leu-Aib-Gly-Ile-Leu-OMe:** mp 125–128 °C;  $R_{f1}$  0.20;  $R_{f2}$  0.85;  $R_{f3}$  0.00;  $[\alpha]_D^{20}$  -21.3 (*c* 0.5, MeOH);  $^1\text{H NMR}$  (200 MHz,  $\text{CD}_3\text{CN}$ )  $\delta$  9.42 (t, 1H, NH Gly<sup>6</sup>), 7.75 (t, 1H, NH Gly<sup>5</sup>), 7.67 (d, 1H, NH Leu<sup>3</sup>), 7.540 (s, 1H, NH Aib<sup>4</sup>), 7.40 (t, 1H, NH Gly<sup>2</sup>), 7.33 (t, 1H, NH Gly<sup>9</sup>), 7.29 (d, 1H, NH Ile<sup>10</sup>), 7.28 (d, 1H, NH Leu<sup>7</sup>), 7.27 (s, 1H, NH Aib<sup>8</sup>), 7.17 (s, 1H, NH Aib<sup>1</sup>), 7.07 (d, 1H, NH Leu<sup>11</sup>), 4.21 (m, 1H,  $\alpha$ -CH Leu<sup>11</sup>), 4.20 (m, 1H,  $\alpha$ -CH Leu<sup>7</sup>), 4.17 (m, 1H,  $\alpha$ -CH Leu<sup>3</sup>), 4.05 (dd, 1H,  $\alpha$ -CH Ile<sup>10</sup>), 3.78 (dd, 1H, 1  $\alpha$ -CH Gly<sup>6</sup>), 3.74 (dd, 1H, 1  $\alpha$ -CH Gly<sup>6</sup>), 3.71 (s, 3H, CH<sub>3</sub> OMe), 3.67 (dd, 1H, 1  $\alpha$ -CH Gly<sup>9</sup>), 3.65 (dd, 1H, 1  $\alpha$ -CH Gly<sup>2</sup>), 3.64 (m, 2H,  $\alpha$ -CH Gly<sup>5</sup>), 3.60 (dd, 1H, 1  $\alpha$ -CH Gly<sup>9</sup>), 3.58 (dd, 1H, 1  $\alpha$ -CH Gly<sup>2</sup>), 2.15 (t, 2H,  $\beta$ -CH<sub>2</sub> *n*-Oct), 2.15 (m, 2H,  $\delta$ -CH<sub>2</sub> *n*-Oct), 1.84 (m, 1H,  $\beta$ -CH Ile<sup>10</sup>), 1.68 (m, 1H,  $\gamma$ -CH Leu<sup>3</sup>), 1.60 (m, 1H,  $\gamma$ -CH Leu<sup>7</sup>), 1.59 (m, 1H,  $\gamma$ -CH Leu<sup>11</sup>), 1.53 (m, 1H, 1  $\beta$ -CH Leu<sup>11</sup>), 1.53 (m, 2H,  $\beta$ -CH<sub>2</sub> Leu<sup>7</sup>), 1.53 (m, 2H,  $\beta$ -CH<sub>2</sub> Leu<sup>3</sup>), 1.50 (m, 2H,  $\gamma$ -CH<sub>2</sub> *n*-Oct), 1.48 (m, 1H, 1  $\beta$ -CH Leu<sup>11</sup>), 1.47 (m, 1H,  $\gamma$ -CH<sub>2</sub> Ile<sup>10</sup>), 1.46 (s, 6H, 2  $\beta$ -CH<sub>3</sub> Aib<sup>4</sup>), 1.35 (s, 6H, 2  $\beta$ -CH<sub>3</sub> Aib<sup>8</sup>), 1.32 (s, 6H, 2  $\beta$ -CH<sub>3</sub> Aib<sup>1</sup>), 1.28 (m, 1H, 1  $\gamma$ -CH<sub>2</sub> Ile<sup>10</sup>), 0.88 (m, 3H,  $\delta$ -CH<sub>3</sub> Leu<sup>3</sup>), 0.87 (m, 3H,  $\delta$ -CH<sub>3</sub> Leu<sup>11</sup>), 0.86 (d, 3H,  $\gamma$ -CH<sub>3</sub> Ile<sup>10</sup>), 0.83 (m, 3H,  $\delta$ -CH<sub>3</sub> Leu<sup>3</sup>), 0.81 (m, 3H,  $\delta$ -CH<sub>3</sub> Ile<sup>10</sup>), 0.80 (t, 3H,  $\omega$ -CH<sub>3</sub> *n*-Oct), 0.78 (m, 3H,  $\delta$ -CH<sub>3</sub> Leu<sup>11</sup>); IR (KBr): 3302, 1742, 1657, 1651, 1536  $\text{cm}^{-1}$ .

**Boc-Gly-ψ[CS-NH]-Ile-Leu-OMe:** oil;  $R_{f1}$  0.90;  $R_{f2}$  0.92;  $R_{f3}$  0.60;  $[\alpha]_D^{20}$  -56.1 (*c* 0.5, MeOH);  $^1\text{H NMR}$  (200 MHz,  $\text{CDCl}_3$ )  $\delta$  8.74 (d, 1H, Ile NH), 6.53–6.48 (d, 1H, Leu NH), 5.45–5.37 (t, 1H, Gly NH), 4.62–3.76 (m, 4H, Ile  $\alpha$ CH, Leu  $\alpha$ CH, Gly  $\alpha$ CH<sub>2</sub>), 3.71 (s, 3H, OMe CH<sub>3</sub>), 2.20–1.46 (m, 6H, Ile  $\beta$ -CH and  $\gamma$ -CH<sub>2</sub>, Leu  $\beta$ -CH<sub>2</sub> and  $\gamma$ -CH), 1.44 (s, 9H, Boc 3 CH<sub>3</sub>), 1.00–0.74 (m, 12H, Leu 2  $\delta$ -CH<sub>3</sub>, Ile  $\gamma$ -CH<sub>3</sub> and  $\delta$ -CH<sub>3</sub>); IR (KBr): 3313, 1747, 1721, 1659, 1594, 1524  $\text{cm}^{-1}$ .

***n*-Oct-Aib-Gly-Leu-Aib-Gly-Gly-Leu-Aib-Gly-ψ[CS-NH]-Ile-Leu-OMe:** oil;  $R_{f1}$  0.20;  $R_{f2}$  0.87;  $R_{f3}$  0.00;  $[\alpha]_D^{20}$  -23.3 (*c* 0.2, MeOH);  $^1\text{H NMR}$  (400 MHz,  $\text{CD}_3\text{CN}$ )  $\delta$  8.96 (d, 1H, NH Ile<sup>10</sup>), 7.91 (t, 1H, NH Gly<sup>6</sup>), 7.84 (t, 1H, NH Gly<sup>5</sup>), 7.74 (d, 1H, NH Leu<sup>3</sup>), 7.69 (t, 1H, NH Gly<sup>2</sup>), 7.66 (t, 1H, NH Gly<sup>9</sup>), 7.60 (d, 1H, NH Leu<sup>7</sup>), 7.540 (s, 1H, NH Aib<sup>4</sup>), 7.52 (s, 1H, NH Aib<sup>8</sup>), 7.35 (s, 1H, NH Aib<sup>1</sup>), 7.13 (d, 1H, NH Leu<sup>11</sup>), 4.21 (m, 1H,  $\alpha$ -CH Leu<sup>11</sup>), 4.20 (m, 1H,  $\alpha$ -CH Leu<sup>7</sup>), 4.17 (m, 1H,  $\alpha$ -CH Leu<sup>3</sup>), 4.05 (dd, 1H,  $\alpha$ -CH Ile<sup>10</sup>), 3.78 (dd, 1H, 1  $\alpha$ -CH Gly<sup>6</sup>), 3.74 (dd, 1H, 1  $\alpha$ -CH Gly<sup>6</sup>), 3.71 (s, 3H, CH<sub>3</sub> OMe), 3.68 (dd, 1H, 1  $\alpha$ -CH Gly<sup>9</sup>), 3.66 (dd, 1H,

1  $\alpha$ -CH Gly<sup>2</sup>), 3.64 (m, 2H,  $\alpha$ -CH<sub>2</sub> Gly<sup>5</sup>), 3.60 (dd, 1H, 1  $\alpha$ -CH Gly<sup>9</sup>), 3.58 (dd, 1H, 1  $\alpha$ -CH Gly<sup>2</sup>), 2.25 (t, 2H,  $\beta$ -CH<sub>2</sub> *n*-Oct), 1.57 (m, 2H,  $\gamma$ -CH<sub>2</sub> *n*-Oct), 2.15 (m, 2H,  $\delta$ -CH<sub>2</sub> *n*-Oct), 1.84 (m, 1H,  $\beta$ -CH Ile<sup>10</sup>), 1.53 (m, 2H,  $\beta$ -CH<sub>2</sub> Leu<sup>7</sup>), 1.53 (m, 2H,  $\beta$ -CH<sub>2</sub> Leu<sup>3</sup>), 1.68 (m, 1H,  $\gamma$ -CH Leu<sup>3</sup>), 1.60 (m, 1H,  $\gamma$ -CH Leu<sup>7</sup>), 1.59 (m, 1H,  $\gamma$ -CH Leu<sup>11</sup>), 1.48 (m, 1H, 1  $\beta$ -CH Leu<sup>11</sup>), 1.53 (m, 1H, 1  $\beta$ -CH Leu<sup>11</sup>), 1.47 (m, 1H,  $\gamma$ -CH Ile<sup>10</sup>), 1.46 (s, 6H, 2  $\beta$ -CH<sub>3</sub> Aib<sup>4</sup>), 1.35 (s, 6H, 2  $\beta$ -CH<sub>3</sub> Aib<sup>8</sup>), 1.32 (s, 6H, 2  $\beta$ -CH<sub>3</sub> Aib<sup>1</sup>), 1.28 (m, 1H, 1  $\gamma$ -CH Ile<sup>10</sup>), 0.88 (m, 3H,  $\delta$ -CH<sub>3</sub> Leu<sup>3</sup>), 0.86 (m, 3H,  $\delta$ -CH<sub>3</sub> Leu<sup>11</sup>), 0.84 (d, 3H,  $\gamma$ -CH<sub>3</sub> Ile<sup>10</sup>), 0.83 (m, 3H,  $\delta$ -CH<sub>3</sub> Leu<sup>3</sup>), 0.82 (m, 3H,  $\delta$ -CH<sub>3</sub> Ile<sup>10</sup>), 0.79 (t, 3H,  $\omega$ -CH<sub>3</sub> *n*-Oct), 0.78 (m, 3H,  $\delta$ -CH<sub>3</sub> Leu<sup>11</sup>); IR (KBr): 3299, 1741, 1660, 1537 cm<sup>-1</sup>.

## References

1. De Zotti, M.; Biondi, B.; Peggion, C.; Formaggio, F.; Park, Y.; Hahm, K.-S.; Toniolo, C. *Org. Biomol. Chem.* **2012**, *10*, 1285–1299. doi:10.1039/c1ob06178j
2. Gurunath, R.; Balaram, P. *Biopolymers* **1995**, *35*, 21–29. doi:10.1002/bip.360350104
3. Iida, A.; Yoshimatsu, S.; Sanekata, M.; Fujita, T. *Chem. Pharm. Bull.* **1990**, *38*, 2997–3003. doi:10.1248/cpb.38.2997
4. Brückner, H.; Koza, A. *Amino Acids* **2003**, *24*, 311–323. doi:10.1007/s00726-002-0401-x
5. Nagaraj, R.; Balaram, P. *Tetrahedron* **1981**, *37*, 1263–1270. doi:10.1016/S0040-4020(01)92061-7
